# Supplementary material
Source: MDPI journal article supplement (https://www.mdpi.com/2313-0105/9/7/367)
Supplement: s1 [file s1]

## S1. Reaction mechanisms in literature

**Table S1.** Overview of the reaction mechanisms during charging (CH)/discharging (DCH) mentioned in the literature. The reaction equations are normalized to a transfer of 6 e<sup>−</sup> for better comparability. (based on [1].)

|         | # | Chemical Reaction Equation                                                                                                                                                                                                                                                                                                                                                                                                                                                            | Source         |
|---------|---|---------------------------------------------------------------------------------------------------------------------------------------------------------------------------------------------------------------------------------------------------------------------------------------------------------------------------------------------------------------------------------------------------------------------------------------------------------------------------------------|----------------|
| Anode   | 1 | <b>Zn/Zn<sup>2+</sup> Dissolution (DCH)/Deposition (CH):</b><br>$3 \text{ Zn} \rightleftharpoons 3 \text{ Zn}^{2+} + 6 \text{ e}^{-}$ ( $E_0 = 0 \text{ V vs. Zn/Zn}^{2+}$ )                                                                                                                                                                                                                                                                                                          | [2–7]          |
|         | 2 | <b>Hydrogen Evolution Reaction (HER, CH):</b><br>$6 \text{ H}^{+} + 6 \text{ e}^{-} \rightarrow 3 \text{ H}_2 \uparrow$ ( $E_0 = +0.52 \text{ V vs. Zn/Zn}^{2+}$ , pH ~4)                                                                                                                                                                                                                                                                                                             | [2,8–10]       |
|         | 3 | <b>MnO<sub>2</sub>/Mn<sup>2+</sup> Dissolution/Deposition:</b><br>$3 \text{ MnO}_2 + 6 \text{ e}^{-} + 12 \text{ H}^{+} \rightleftharpoons 3 \text{ Mn}^{2+} + 6 \text{ H}_2\text{O}$<br>( $E_0 = +1.54 \text{ V vs. Zn/Zn}^{2+}$ , pH ~4) <i>proton source: H<sub>2</sub>O</i>                                                                                                                                                                                                       | [2,7,8,10–16]  |
| Cathode | 4 | <b>Alternative mechanism:</b><br>$3 \text{ MnO}_2 + 12 [\text{M}(\text{H}_2\text{O})_6]^{2+} + 6 \text{ e}^{-} \rightleftharpoons 3 \text{ Mn}^{2+} + 12 [\text{M}(\text{H}_2\text{O})_5\text{OH}]^{+} + 6 \text{ H}_2\text{O}$<br><i>proton source: [M(H<sub>2</sub>O)<sub>6</sub>]<sup>2+</sup>, here: M = Zn or Mn</i>                                                                                                                                                             | [17–20]        |
|         | 5 | <b>Zinc hydroxide sulfate (ZHS) precipitation/dissolution:</b><br>$12 \text{ OH}^{-} + 2 \text{ SO}_4^{2-} + 8 \text{ Zn}^{2+} + 2n \text{ H}_2\text{O} \rightleftharpoons 2 \text{ Zn}_4(\text{OH})_6\text{SO}_4 \cdot n \text{ H}_2\text{O}$<br><i>with n = [4, 5]</i><br><b>MHO precipitation/dissolution (universal):</b><br>$[\text{M}(\text{H}_2\text{O})_6]^{2+} + 2 \text{ OH}^{-} \rightleftharpoons \text{M}(\text{OH})_2 + 6 \text{ H}_2\text{O}$ <i>with M = Zn or Mn</i> | [8,12,21]      |
|         | 6 | <b>Zn<sup>2+</sup> intercalation (DCH)/deintercalation (CH):</b><br>$x \text{ Zn}^{2+} + 2x \text{ e}^{-} + \text{MnO}_2 \rightleftharpoons \text{Zn}_x\text{MnO}_2$                                                                                                                                                                                                                                                                                                                  | [3,5,11,22–39] |
|         | 7 | <b>H<sup>+</sup> intercalation (DCH)/deintercalation (CH):</b><br>$6 \text{ MnO}_2 + 6 \text{ H}^{+} + 6 \text{ e}^{-} \rightleftharpoons 6 \text{ HMnO}_2$                                                                                                                                                                                                                                                                                                                           | [8]            |
|         | 8 | <b>O<sub>2</sub>-reduction (ORR, DCH)/O<sub>2</sub>-formation (OER, CH):</b><br>$1,5 \text{ O}_2 + 6 \text{ H}^{+} + 6 \text{ e}^{-} \rightleftharpoons 3 \text{ H}_2\text{O}$ ( $E_0 = +1.75 \text{ V vs. Zn/Zn}^{2+}$ , pH ~4)                                                                                                                                                                                                                                                      | [2,8,10,40]    |
|         | 9 | <b>Formation of (inert) ZnMn<sub>2</sub>O<sub>4</sub> (CH):</b><br>$3 \text{ Zn}^{2+} + 6 \text{ Mn}^{2+} + 24 \text{ OH}^{-} \rightarrow 3 \text{ ZnMn}_2\text{O}_4 + 12 \text{ H}_2\text{O} + 6 \text{ e}^{-}$                                                                                                                                                                                                                                                                      | [8,11]         |

## S2. Energy density estimates

- substance concentration  $c(\text{Zn}^{2+}) = c(\text{Mn}^{2+}) = 1 \text{ mol.l}^{-1}$ ,
- **volumetric energy density** in Wh.l<sup>−1</sup>, based on *Faraday's law* ( $z = 2$  for the chemical reaction 3 (s. **Error! Reference source not found.**), nominal discharge voltage approx. 1,65 V at pH 4):  

$$\frac{E}{V} = UczF = 1,65 \text{ V} \cdot 1 \text{ mol.l}^{-1} \cdot 2 \cdot 96.485 \text{ As.mol}^{-1} = 192.970 \text{ As.l}^{-1} = \mathbf{88,4 \text{ Wh.l}^{-1}}$$
- **electrolyte volume 11,3 l.kWh<sup>−1</sup>**,
- **specific weight for 1 l electrolyte** (based on a reference electrolyte composition with 1 M Zn(CH<sub>3</sub>COO)<sub>2</sub>, 1 M Mn(CH<sub>3</sub>COO)<sub>2</sub>):
  - assumption 50 ml equal to 58,86 g,
  - equal to 1,177 g/ml,
  - equal to 1,177 kg/l electrolyte.
- **gravimetric energy density** in Wh.kg<sup>−1</sup>  

$$\frac{E}{m} = \frac{UczF}{m_{\text{Elektrolyt}}} = \frac{1,65 \text{ V} \cdot 1 \text{ mol.l}^{-1} \cdot 2 \cdot 96.485 \text{ As.mol}^{-1}}{1,18 \text{ kg}} = \mathbf{75,0 \text{ Wh.kg}^{-1}}$$

- **material values:**  $\rho(\text{H}_2\text{O}) = 0,997 \text{ kg.l}^{-1}$ ,  $\rho(\text{Zn}(\text{CH}_3\text{COO})_2 \cdot 2 \text{ H}_2\text{O}) = 1,74 \text{ kg.l}^{-1}$ ,  $\rho(\text{Mn}(\text{CH}_3\text{COO})_2 \cdot 4 \text{ H}_2\text{O}) = 1,59 \text{ kg.l}^{-1}$ ,  $M(\text{Zn}(\text{CH}_3\text{COO})_2 \cdot 2 \text{ H}_2\text{O}) = 219,50 \text{ g.mol}^{-1}$ ,  $M(\text{Mn}(\text{CH}_3\text{COO})_2 \cdot 4 \text{ H}_2\text{O}) = 245,09 \text{ g.mol}^{-1}$  [41]
- **specific cost:**  $g(\text{Zn}(\text{CH}_3\text{COO})_2) = 1.00 \text{ $.kg}^{-1}$ ,  $g(\text{Mn}(\text{CH}_3\text{COO})_2 \cdot 4 \text{ H}_2\text{O}) = 1.00 \text{ $.kg}^{-1}$
- **total cost electrolyte:**  $m_{\text{tot}} = \sum_i c_i M_i g_i = 0.40 \text{ $.l}^{-1} \rightarrow 4.46 \text{ $.kWh}^{-1}$

*Note: The specific cost calculations are based on price estimates from alibaba.com. This is for sure not a reliable and absolute price quotation, but at least reflects the price range and the cost potential.*

### S3. C-rate calculations & transformations

| Source | Current Rate            | Transformation                                                          | C-Rate / C or 1.h <sup>-1</sup> |
|--------|-------------------------|-------------------------------------------------------------------------|---------------------------------|
| [18]   | 20.6 A.g <sup>-1</sup>  | in paper: 1 C = 0.574 A.g <sup>-1</sup>                                 | ~36                             |
| [42]   | 1 A.g <sup>-1</sup>     | initial capacity approx. 100 mAh.g <sup>-1</sup> (s. Figure 8 in paper) | ~10                             |
| [43]   | 10 mA.cm <sup>-2</sup>  | charge capacity 0.8 mAh.cm <sup>-2</sup>                                | 12.5                            |
| [44]   | 7000 mA.g <sup>-1</sup> | specific capacity 374 mAh.g <sup>-1</sup>                               | 18.7                            |

### S4. Ionic conductivity for ZMB electrolytes

**Table S2.** Overview of selected electrolyte compositions with the respective pH and ionic conductivity values. [1.]

| Electrolyte Composition                                 | pH  | Ionic Conductivity/mS.cm <sup>-1</sup> |
|---------------------------------------------------------|-----|----------------------------------------|
| 0.5 M MnSO <sub>4</sub>                                 | 3.5 | 30.3                                   |
| 2.0 M ZnSO <sub>4</sub>                                 | 3.6 | 55.4                                   |
| 2.0 M ZnSO <sub>4</sub> + 0.5 M MnSO <sub>4</sub>       | 3.1 | 48.6                                   |
| 2.0 M Zn(CF <sub>3</sub> SO <sub>3</sub> ) <sub>2</sub> | 4.0 | 60.5                                   |

### S5. Industrial approaches for ZIB.

**Table S3.** Overview of a selection of relevant industrial approaches to zinc-based battery cell chemistry (as of 2022).

| Name<br>Country<br>CEO/CTO                                                | Founding                                                  | Battery Cell Technology                                                                 | State of Research                                                                                                                                                                                      | Source     |
|---------------------------------------------------------------------------|-----------------------------------------------------------|-----------------------------------------------------------------------------------------|--------------------------------------------------------------------------------------------------------------------------------------------------------------------------------------------------------|------------|
| <b>Urban Electric Power</b><br>USA<br>Sanjoy Banerjee/<br>Jinchao Huang   | Spin-off<br>(CUNY Energy Institute <sup>1</sup> )<br>2012 | Zn//MnO <sub>2</sub> ,<br>alkaline electrolyte                                          | <ul style="list-style-type: none"> <li>Pilot projects (20-1000 kWh)</li> <li>300-1000 cycles (at DOD 50-10%), C-rate 1/2-1/24, 380-600 V output voltage</li> <li>Cost: \$50/kWh per battery</li> </ul> | [45–47]    |
| <b>Enerpoly AB</b><br>Sweden<br>Eloisa de Castro/<br>Dr. Mylad<br>Chamoun | 2018                                                      | Zn//MnO <sub>2</sub><br>acid electrolyte<br>(ZnSO <sub>4</sub> /<br>MnSO <sub>4</sub> ) | <ul style="list-style-type: none"> <li>Cell chemistry is based on published literature</li> <li>Patent for nanoporous zinc foam anodes, [48]</li> <li>Current status: Cell concept</li> </ul>          | [11,49,50] |

<sup>1</sup> The City College of New York CUNY Energy Institute

|                                                                             |      |                                                                                                                               |                                                                                                                                                                                                                                                                               |         |
|-----------------------------------------------------------------------------|------|-------------------------------------------------------------------------------------------------------------------------------|-------------------------------------------------------------------------------------------------------------------------------------------------------------------------------------------------------------------------------------------------------------------------------|---------|
| <b>Eos Energy Enterprises</b><br>USA<br>Joe Mastrangelo/<br>Carlos Restrepo | 2008 | Znyth®<br>Zn/X (with Halide<br>X = Br, Cl, I)<br>neutral electrolyte<br>(ZnBr <sub>2</sub> , KBr, KCl,<br>additive)           | <ul style="list-style-type: none"> <li>Carbon fleece cathode with ceramic-coated titanium current arrester</li> <li>98.2% annual capacity retention after 20+ years of operation, 100% DOD, C-rate 1/3-1/12</li> <li>Cost estimation up to \$95/kWh (system level)</li> </ul> | [51,52] |
|                                                                             |      |                                                                                                                               |                                                                                                                                                                                                                                                                               |         |
| <b>Salient Energy</b><br>Canada<br>Brian Adams                              | 2016 | Zn/V <sub>x</sub> O <sub>y</sub> - bzw.<br>Mo <sub>x</sub> O <sub>y</sub> -based cathode<br>zinc salt electrolyte<br>(pH 1-9) | <ul style="list-style-type: none"> <li>capacity 60 Ah, cell voltage 1,3 V, energy density 100 Wh.l<sup>-1</sup> and 60 Wh.kg<sup>-1</sup>, self discharge 0 % (2 weeks) and 5 % (6 months)</li> <li>cell fabrication with 100 pieces/month</li> </ul>                         | [53–56] |

## S1. References

- Fitz, O.; Bischoff, C.; Bauer, M.; Gentischer, H.; Birke, K.P.; Henning, H.-M.; Biro, D. Electrolyte Study with in Operando pH Tracking Providing Insight into the Reaction Mechanism of Aqueous Acidic Zn/MnO<sub>2</sub> Batteries. *ChemElectroChem* **2021**, *8*, 3553–3566, doi:10.1002/celec.202100888.
- Atkins, P.W.; de Paula, J. *Physical chemistry*, 9th ed.; W.H. Freeman and Co: New York, 2010, ISBN 9781429218122.
- Sun, W.; Wang, F.; Hou, S.; Yang, C.; Fan, X.; Ma, Z.; Gao, T.; Han, F.; Hu, R.; Zhu, M.; et al. Zn/MnO<sub>2</sub> Battery Chemistry With H<sup>+</sup> and Zn<sup>2+</sup> Coinsertion. *J. Am. Chem. Soc.* **2017**, *139*, 9775–9778, doi:10.1021/jacs.7b04471.
- Pan, H.; Shao, Y.; Yan, P.; Cheng, Y.; Han, K.S.; Nie, Z.; Wang, C.; Yang, J.; Li, X.; Bhattacharya, P.; et al. Reversible aqueous zinc/manganese oxide energy storage from conversion reactions. *Nat. Energy* **2016**, *1*, 16039, doi:10.1038/nenergy.2016.39.
- Xu, D.; Li, B.; Wei, C.; He, Y.-B.; Du, H.; Chu, X.; Qin, X.; Yang, Q.-H.; Kang, F. Preparation and Characterization of MnO<sub>2</sub>/acid-treated CNT Nanocomposites for Energy Storage with Zinc Ions. *Electrochim. Acta* **2014**, *133*, 254–261, doi:10.1016/j.electacta.2014.04.001.
- Kim, S.H.; Oh, S.M. Degradation mechanism of layered MnO<sub>2</sub> cathodes in Zn/ZnSO<sub>4</sub>/MnO<sub>2</sub> rechargeable cells. *J. Power Sources* **1998**, *72*, 150–158, doi:10.1016/S0378-7753(97)02703-1.
- Lee, B.; Seo, H.R.; Lee, H.R.; Yoon, C.S.; Kim, J.H.; Chung, K.Y.; Cho, B.W.; Oh, S.H. Critical Role of pH Evolution of Electrolyte in the Reaction Mechanism for Rechargeable Zinc Batteries. *ChemSusChem* **2016**, *9*, 2948–2956, doi:10.1002/cssc.201600702.
- Li, L.; Hoang, T.K.A.; Zhi, J.; Han, M.; Li, S.; Chen, P. Functioning Mechanism of the Secondary Aqueous Zn-β-MnO<sub>2</sub> Battery. *ACS Appl. Mater. Interfaces* **2020**, *12*, 12834–12846, doi:10.1021/acsami.9b22758.
- Mainar, A.R.; Iruin, E.; Colmenares, L.C.; Kvasha, A.; Meatza, I. de; Bengoechea, M.; Leonet, O.; Boyano, I.; Zhang, Z.; Blazquez, J.A. An overview of progress in electrolytes for secondary zinc-air batteries and other storage systems based on zinc. *J. Energy Storage* **2018**, *15*, 304–328, doi:10.1016/j.est.2017.12.004.
- Pourbaix, M. *Atlas of electrochemical equilibria in aqueous solutions*, 2nd ed.; NACE International: Houston, 1974, ISBN 0915567989.
- Chamoun, M.; Brant, W.R.; Tai, C.-W.; Karlsson, G.; Noréus, D. Rechargeability of aqueous sulfate Zn/MnO<sub>2</sub> batteries enhanced by accessible Mn<sup>2+</sup> ions. *Energy Storage Mater.* **2018**, *15*, 351–360, doi:10.1016/j.jensm.2018.06.019.
- Guo, X.; Zhou, J.; Bai, C.; Li, X.; Fang, G.; Liang, S. Zn/MnO<sub>2</sub> battery chemistry with dissolution-deposition mechanism. *Mater. Today Energy* **2020**, *16*, 100396, doi:10.1016/j.mtener.2020.100396.
- Liang, G.; Mo, F.; Li, H.; Tang, Z.; Liu, Z.; Wang, D.; Yang, Q.; Ma, L.; Zhi, C. A Universal Principle to Design Reversible Aqueous Batteries Based on Deposition–Dissolution Mechanism. *Adv. Energy Mater.* **2019**, *9*, 1901838, doi:10.1002/aenm.201901838.
- Perez-Antolin, D.; Sáez-Bernal, I.; Colina, A.; Ventosa, E. Float-charging protocol in rechargeable Zn–MnO<sub>2</sub> batteries: Unraveling the key role of Mn<sup>2+</sup> additives in preventing spontaneous pH changes. *Electrochem. Commun.* **2022**, *138*, 107271, doi:10.1016/j.elecom.2022.107271.
- Shen, X.; Wang, X.; Zhou, Y.; Shi, Y.; Zhao, L.; Jin, H.; Di, J.; Li, Q. Highly Reversible Aqueous Zn–MnO<sub>2</sub> Battery by Supplementing Mn<sup>2+</sup>-Mediated MnO<sub>2</sub> Deposition and Dissolution. *Adv. Funct. Mater.* **2021**, *31*, 2101579, doi:10.1002/adfm.202101579.
- Chen, H.; Cai, S.; Wu, Y.; Wang, W.; Xu, M.; Bao, S.-J. Successive electrochemical conversion reaction to understand the performance of aqueous Zn/MnO<sub>2</sub> batteries with Mn<sup>2+</sup> additive. *Mater. Today Energy* **2021**, *20*, 100646, doi:10.1016/j.mtener.2021.100646.
- Mateos, M.; Makivic, N.; Kim, Y.-S.; Limoges, B.; Balland, V. Accessing the Two-Electron Charge Storage Capacity of MnO<sub>2</sub> in Mild Aqueous Electrolytes. *Adv. Energy Mater.* **2020**, *10*, 2000332, doi:10.1002/aenm.202000332.
- Mateos, M.; Harris, K.D.; Limoges, B.; Balland, V. Nanostructured Electrode Enabling Fast and Fully Reversible MnO<sub>2</sub>-to-Mn<sup>2+</sup> Conversion in Mild Buffered Aqueous Electrolytes. *ACS Appl. Energy Mater.* **2020**, *3*, 7610–7618, doi:10.1021/acsaem.0c01039.
- Balland, V.; Mateos, M.; Singh, A.; Harris, K.D.; Laberty-Robert, C.; Limoges, B. The Role of Al<sup>3+</sup>-Based Aqueous Electrolytes in the Charge Storage Mechanism of MnO<sub>x</sub> Cathodes. *Small* **2021**, *17*, e2101515, doi:10.1002/smll.202101515.
- Kim, Y.-S.; Harris, K.D.; Limoges, B.; Balland, V. On the unsuspected role of multivalent metal ions on the charge storage of a metal oxide electrode in mild aqueous electrolytes. *Chem. Sci.* **2019**, *10*, 8752–8763, doi:10.1039/c9sc02397f.

21. Huang, Y.; Mou, J.; Liu, W.; Wang, X.; Dong, L.; Kang, F.; Xu, C. Novel Insights into Energy Storage Mechanism of Aqueous Rechargeable Zn/MnO<sub>2</sub> Batteries with Participation of Mn<sup>2+</sup>. *Nano-Micro Lett.* **2019**, *11*, 860, doi:10.1007/s40820-019-0278-9.
22. Xu, C.; Du, H.; Li, B.; Kang, F.; Zeng, Y. Reversible Insertion Properties of Zinc Ion into Manganese Dioxide and Its Application for Energy Storage. *Electrochem. Solid-State Lett.* **2009**, *12*, A61, doi:10.1149/1.3065967.
23. Xu, C.; Chiang, S.W.; Ma, J.; Kang, F. Investigation on Zinc Ion Storage in Alpha Manganese Dioxide for Zinc Ion Battery by Electrochemical Impedance Spectrum. *J. Electrochem. Soc.* **2012**, *160*, A93–A97, doi:10.1149/2.008302jes.
24. Xu, C.; Li, B.; Du, H.; Kang, F. Energetic zinc ion chemistry: the rechargeable zinc ion battery. *Angew. Chem.* **2012**, *51*, 933–935, doi:10.1002/anie.201106307.
25. Alfuruqi, M.H.; Gim, J.; Kim, S.; Song, J.; Pham, D.T.; Jo, J.; Xiu, Z.; Mathew, V.; Kim, J. A layered  $\delta$ -MnO<sub>2</sub> nanoflake cathode with high zinc-storage capacities for eco-friendly battery applications. *Electrochem. Commun.* **2015**, *60*, 121–125, doi:10.1016/j.elecom.2015.08.019.
26. Alfuruqi, M.H.; Mathew, V.; Gim, J.; Kim, S.; Song, J.; Baboo, J.P.; Choi, S.H.; Kim, J. Electrochemically Induced Structural Transformation in a  $\gamma$ -MnO<sub>2</sub> Cathode of a High Capacity Zinc-Ion Battery System. *Chem. Mater.* **2015**, *27*, 3609–3620, doi:10.1021/cm504717p.
27. Alfuruqi, M.H.; Gim, J.; Kim, S.; Song, J.; Jo, J.; Kim, S.; Mathew, V.; Kim, J. Enhanced reversible divalent zinc storage in a structurally stable  $\alpha$ -MnO<sub>2</sub> nanorod electrode. *J. Power Sources* **2015**, *288*, 320–327, doi:10.1016/j.jpowsour.2015.04.140.
28. Alfuruqi, M.H.; Islam, S.; Gim, J.; Song, J.; Kim, S.; Pham, D.T.; Jo, J.; Xiu, Z.; Mathew, V.; Kim, J. A high surface area tunnel-type  $\alpha$ -MnO<sub>2</sub> nanorod cathode by a simple solvent-free synthesis for rechargeable aqueous zinc-ion batteries. *Chem. Phys. Lett.* **2016**, *650*, 64–68, doi:10.1016/j.cplett.2016.02.067.
29. Zhang, N.; Cheng, F.; Liu, Y.; Zhao, Q.; Lei, K.; Chen, C.; Liu, X.; Chen, J. Cation-Deficient Spinel ZnMn<sub>2</sub>O<sub>4</sub> Cathode in Zn(CF<sub>3</sub>SO<sub>3</sub>)<sub>2</sub> Electrolyte for Rechargeable Aqueous Zn-Ion Battery. *J. Am. Chem. Soc.* **2016**, *138*, 12894–12901, doi:10.1021/jacs.6b05958.
30. Zhang, N.; Cheng, F.; Liu, J.; Wang, L.; Long, X.; Liu, X.; Li, F.; Chen, J. Rechargeable aqueous zinc-manganese dioxide batteries with high energy and power densities. *Nat. Commun.* **2017**, *8*, 405, doi:10.1038/s41467-017-00467-x.
31. Alfuruqi, M.H.; Islam, S.; Putro, D.Y.; Mathew, V.; Kim, S.; Jo, J.; Kim, S.; Sun, Y.-K.; Kim, K.; Kim, J. Structural transformation and electrochemical study of layered MnO<sub>2</sub> in rechargeable aqueous zinc-ion battery. *Electrochim. Acta* **2018**, *276*, 1–11, doi:10.1016/j.electacta.2018.04.139.
32. Hao, J.; Mou, J.; Zhang, J.; Dong, L.; Liu, W.; Xu, C.; Kang, F. Electrochemically induced spinel-layered phase transition of Mn<sub>3</sub>O<sub>4</sub> in high performance neutral aqueous rechargeable zinc battery. *Electrochim. Acta* **2018**, *259*, 170–178, doi:10.1016/j.electacta.2017.10.166.
33. Wu, B.; Zhang, G.; Yan, M.; Xiong, T.; He, P.; He, L.; Xu, X.; Mai, L. Graphene Scroll-Coated  $\alpha$ -MnO<sub>2</sub> Nanowires as High-Performance Cathode Materials for Aqueous Zn-Ion Battery. *Small* **2018**, *14*, e1703850, doi:10.1002/smll.201703850.
34. Li, Y.; Wang, S.; Salvador, J.R.; Wu, J.; Liu, B.; Yang, W.; Yang, J.; Zhang, W.; Liu, J.; Yang, J. Reaction Mechanisms for Long-Life Rechargeable Zn/MnO<sub>2</sub> Batteries. *Chem. Mater.* **2019**, *31*, 2036–2047, doi:10.1021/acs.chemmater.8b05093.
35. Wang, X.; Zheng, S.; Zhou, F.; Qin, J.; Shi, X.; Wang, S.; Sun, C.; Bao, X.; Wu, Z.-S. Scalable fabrication of printed Zn//MnO<sub>2</sub> planar micro-batteries with high volumetric energy density and exceptional safety. *Natl. Sci. Rev.* **2020**, *7*, 64–72, doi:10.1093/nsr/nwz070.
36. Yang, S.; Zhang, M.; Wu, X.; Wu, X.; Zeng, F.; Li, Y.; Duan, S.; Fan, D.; Yang, Y.; Wu, X. The excellent electrochemical performances of ZnMn<sub>2</sub>O<sub>4</sub>/Mn<sub>2</sub>O<sub>3</sub>: The composite cathode material for potential aqueous zinc ion batteries. *J. Electroanal. Chem.* **2019**, *832*, 69–74, doi:10.1016/j.jelechem.2018.10.051.
37. Qiu, C.; Zhu, X.; Xue, L.; Ni, M.; Zhao, Y.; Liu, B.; Xia, H. The function of Mn<sup>2+</sup> additive in aqueous electrolyte for Zn/ $\delta$ -MnO<sub>2</sub> battery. *Electrochim. Acta* **2020**, *351*, 136445, doi:10.1016/j.electacta.2020.136445.
38. Khamsanga, S.; Pornprasertsuk, R.; Yonezawa, T.; Mohamad, A.A.; Kheawhom, S.  $\delta$ -MnO<sub>2</sub> nanoflower/graphite cathode for rechargeable aqueous zinc ion batteries. *Sci. Rep.* **2019**, *9*, 8441, doi:10.1038/s41598-019-44915-8.
39. Ko, J.S.; Sassin, M.B.; Parker, J.F.; Rolison, D.R.; Long, J.W. Combining battery-like and pseudocapacitive charge storage in 3D MnO<sub>x</sub>@carbon electrode architectures for zinc-ion cells. *Sustainable Energy Fuels* **2018**, *2*, 626–636, doi:10.1039/C7SE00540G.
40. Bischoff, C.F.; Fitz, O.S.; Burns, J.; Bauer, M.; Gentischer, H.; Birke, K.P.; Henning, H.-M.; Biro, D. Revealing the Local pH Value Changes of Acidic Aqueous Zinc Ion Batteries with a Manganese Dioxide Electrode during Cycling. *J. Electrochem. Soc.* **2020**, *167*, 20545, doi:10.1149/1945-7111/ab6c57.
41. CRC Handbook of Chemistry and Physics: A ready-reference book of chemical and physical data; Haynes, W.M., Ed., 97th edition; CRC Press: Boca Raton, London, New York, 2017, ISBN 9781498754286.
42. Zhang, W.; Dai, Y.; Chen, R.; Xu, Z.; Li, J.; Zong, W.; Li, H.; Li, Z.; Zhang, Z.; Zhu, J.; et al. Highly Reversible Zinc Metal Anode in a Dilute Aqueous Electrolyte Enabled by a pH Buffer Additive. *Angew. Chem. Int. Ed.* **2023**, *62*, e202212695, doi:10.1002/anie.202212695.
43. Liu, Z.; Yang, Y.; Liang, S.; Lu, B.; Zhou, J. pH-Buffer Contained Electrolyte for Self-Adjusted Cathode-Free Zn–MnO<sub>2</sub> Batteries with Coexistence of Dual Mechanisms. *Small Struct.* **2021**, *2*, 2100119, doi:10.1002/ssr.202100119.
44. Molaei, E.; Doroodmand, M.M.; Shaali, R. Tartaric acid as a novel additive for approaching high-performance capacity retention in zinc-ion battery. *Sci Rep* **2022**, *12*, 13301, doi:10.1038/s41598-022-13897-5.
45. McClanahan, A. *Urban Electric Power Takes Energy Storage from Startup to Grid-Scale*; Washington DC, USA, 2022.
46. Urban Electric Power. Urban Electric Power. Available online: <https://urbanelectricpower.com/> (accessed on 27 May 2022).

- 
47. Srivastava, S. *Comprehensive Microgrid Energy Storage Designs with Guaranteed Optimality: ESTCP Project EW19-5054*, Alexandria, VA, USA, 2020. Available online: <https://www.serdp-estcp.org/content/download/52270/514263/file/EW19-5054%20Final%20Report.pdf> (accessed on 27 May 2022).
  48. Steingart, D.A.; Chamoun, M.; Hertzberg, B.; Davies, G.; Hsieh, A.G. Hyper-dendritic nanoporous zinc foam anodes, methods of producing the same, and methods for their use. 15/049,489, February 22, 2016.
  49. Chamoun, M.; Hertzberg, B.J.; Gupta, T.; Davies, D.; Bhadra, S.; van Tassell, B.; Erdonmez, C.; Steingart, D.A. Hyper-dendritic nanoporous zinc foam anodes. *NPG Asia Mater.* **2015**, *7*, e178–e178, doi:10.1038/am.2015.32.
  50. Enerpoly AB. Enerpoly: Sustainable batteries for energy storage. Available online: <https://enerpoly.com/> (accessed on 27 May 2022).
  51. Eos Energy Enterprises. Eos Energy Enterprises. Available online: <https://eosenergystorage.com/> (accessed on 30 May 2022).
  52. Spector, J. *Zinc Battery Startup Eos Kept Afloat in a Lithium-Ion World. Is It Ready for the Public Markets?*; Boston, MA, USA, 2020.
  53. Kundu, D.; Adams, B.D.; Duffort, V.; Vajargah, S.H.; Nazar, L.F. A high-capacity and long-life aqueous rechargeable zinc battery using a metal oxide intercalation cathode. *Nat. Energy* **2016**, *1*, 16119, doi:10.1038/nenergy.2016.119.
  54. Adams, B.D.; Kundu, D.; Nazar, L.F. Electrode materials for rechargeable zinc cells and batteries produced therefrom, May 31, 2016.
  55. Adams, B.D. Electrolyte additives for zinc metal electrodes. 16/500,223, May 1, 2018.
  56. Bellini, E. *Salient Energy develops Zinc-ion battery for residential applications*, 2022.
